# Supplementary material for: Two Duplicated Ptpn6 Homeologs Cooperatively and Negatively Regulate RLR-Mediated IFN Response in Hexaploid Gibel Carp
Source: Front Immunol. 2021 Nov 26;12:780667. doi: 10.3389/fimmu.2021.780667 (PMC8662705; doi:10.3389/fimmu.2021.780667)
Supplement: Supplementary Table 1 — Primers used in this study. [file Table_1.xlsx]

## Sheet: Supplementary Table 1
Primer name	Sequence of Oligonucleotide (5'-3')	Purpose
Cgptpn6-5’-Outer	CTCTGCTCTTCGTTACCTTAGTTTCC	RACE
Cgptpn6-5’-Inner	GAGTAATAAGGCTGTTTGAGGTAAACC	RACE
Cgptpn6-3’-Outer	GGACGGAATAAGTGTGTGCCATACT	RACE
Cgptpn6-3’-Inner	CAGCTCGCACCATTTGGCACTACC	RACE
Cgptpn6-A-ORF-F	ATGGTCCGGTGGTTCCACAGAG	PCR
Cgptpn6-A-ORF-R	TTATCGTTTCCTGACAGAGCCACTC	PCR
Cgptpn6-B-ORF-F	ATGGTTCGGTGGTTCCACAGAG	PCR
Cgptpn6-B-ORF-R	TTATCGTTTCCTGACAGATCCACTC	PCR
Cgptpn6-A-RT-F	GTCAGAGTGGGAGACATGATCAC	RT-qPCR
Cgptpn6-A-RT-R	GAGAGCGACTCCCTCACCAGGAA	RT-qPCR
Cgptpn6-B-RT-F	GTCCGTTAGAGTGGGAGAGCTAGTC	RT-qPCR
Cgptpn6-B-RT-R	GAGAGCGACTCCCTCACCAGGAA	RT-qPCR
elfa-RT-F	AGACCAGCAAATACTATGTCACCA	RT-qPCR
elfa-RT-R	GGCACAGTTCCAATACCTCCAA	RT-qPCR
Cgifn-A-RT-F	GCTTCGGGAAATGAGTGGACAAT	RT-qPCR
Cgifn-A-RT-R	TTCACTTTTGTTAGATTCCATTGCG	RT-qPCR
Cgifn-B-RT-F	GGACACCTGTACAACTTGATTGGAG	RT-qPCR
Cgifn-B-RT-R	GCTCTGGATTCATGTGTTCTTTGG	RT-qPCR
Cgviperin-A-RT-F	CAGCCCTGTGGGGATGGATTTATAT	RT-qPCR
Cgviperin-A-RT-R	GAAAATGACCTCTCTCGTGAAGGAA	RT-qPCR
Cgviperin-B-RT-F	CCCTTTTGGGATGGATTTTGCG	RT-qPCR
Cgviperin-B-RT-R	GACTGCCGTTGCTCACGATGCT	RT-qPCR
Cgrig-i-A-RT-F	GCTGCTGGACCAGATGTATTAT	RT-qPCR
Cgrig-i-A-RT-R	GATTGACGGTTCGATCCTTTC	RT-qPCR
Cgrig-i-B-RT-F	GTACCTGGGAAATAAAGAGGCTGTG	RT-qPCR
Cgrig-i-B-RT-R	GTAATCTGAGGCGTGCAAAGTGT	RT-qPCR
Cgirf3-A-RT-F	CCCAACCAAAACCACTCTTCATA	RT-qPCR
Cgirf3-A-RT-R	TCCAAACAGAGGGATCTCCGTT	RT-qPCR
Cgirf3-B-RT-F	CCTTAAAGAAAGTCCCTCACGA	RT-qPCR
Cgirf3-B-RT-R	GTTCCTTTACCATCTTCCCTT	RT-qPCR
CgSHP1-A-Myc/HA-F	CCGGAATTCGGATGGTCCGGTGGTTCCACAGAG	EcoR I Cloning
CgSHP1-A-Myc/HA-R	ATTTGCGGCCGCTTATCGTTTCCTGACAGAGCCACTC	Not I Cloning
CgSHP1-B-Myc/HA-F	CCGGAATTCGGATGGTTCGGTGGTTCCACAGAG	EcoR I Cloning
CgSHP1-B-Myc/HA-R	ATTTGCGGCCGCTTATCGTTTCCTGACAGATCCACTC	Not I Cloning
CgSHP1-A-Flag -F	CCGGAATTCATGGTCCGGTGGTTCCACAGAG	EcoR I Cloning
CgSHP1-A-Flag -R	TGCTCTAGATTACTTGTCATCGTCGTCCTTGTAATCTCGTTTCCTGACAGAGCCAC	Xba I Cloning
CgSHP1-B-Flag -F	CCGGAATTCATGGTTCGGTGGTTCCACAGAG	EcoR I Cloning
CgSHP1-B-Flag-R	ATTTGCGGCCGCTTACTTGTCATCGTCGTCCTTGTAATCTCGTTTCCTGACAGATCCACTC	Not I Cloning
CgSHP1-A-F	CCG GAATTCATGGTCCGGTGGTTCCACAG	EcoR I Cloning
CgSHP1-A-R	TGCTCTAGATTATCGTTTCCTGACAGAGCCAC	Xba I Cloning
CgSHP1-B-F	CCGGAATTCATGGTTCGGTGGTTCCACAGAG	EcoR I Cloning
CgSHP1-B-R	ATTTGCGGCCGCTTATCGTTTCCTGACAGATCCACTC	NotⅠCloning
svcv-n- RT-F	TGAGTGCTGAGGACGAT	RT-qPCR
svcv-n- RT-R	TTTGTGAGTTGCCGTTA	RT-qPCR
svcv-p- RT-F	TTGGACCTGGGATAGTGA	RT-qPCR
svcv-p- RT-R	CTTGCTTGGTTTGTGGG	RT-qPCR
svcv-g- RT-F	CGACCTGGATTAGACTTG	RT-qPCR
svcv-g- RT-R	AATGTTCCGTTTCTCACT	RT-qPCR
svcv-m- RT-F	TACTCCTCCCACTTACGA	RT-qPCR
svcv-m- RT-R	CAAGAGTCCGAGAAGGTC	RT-qPCR
